# Supplementary material
Source: PubMed Central journal article supplement (PMC6166237)
Supplement: NIHMS1505769-supplement-1.pdf [file NIHMS1505769-supplement-1.pdf]

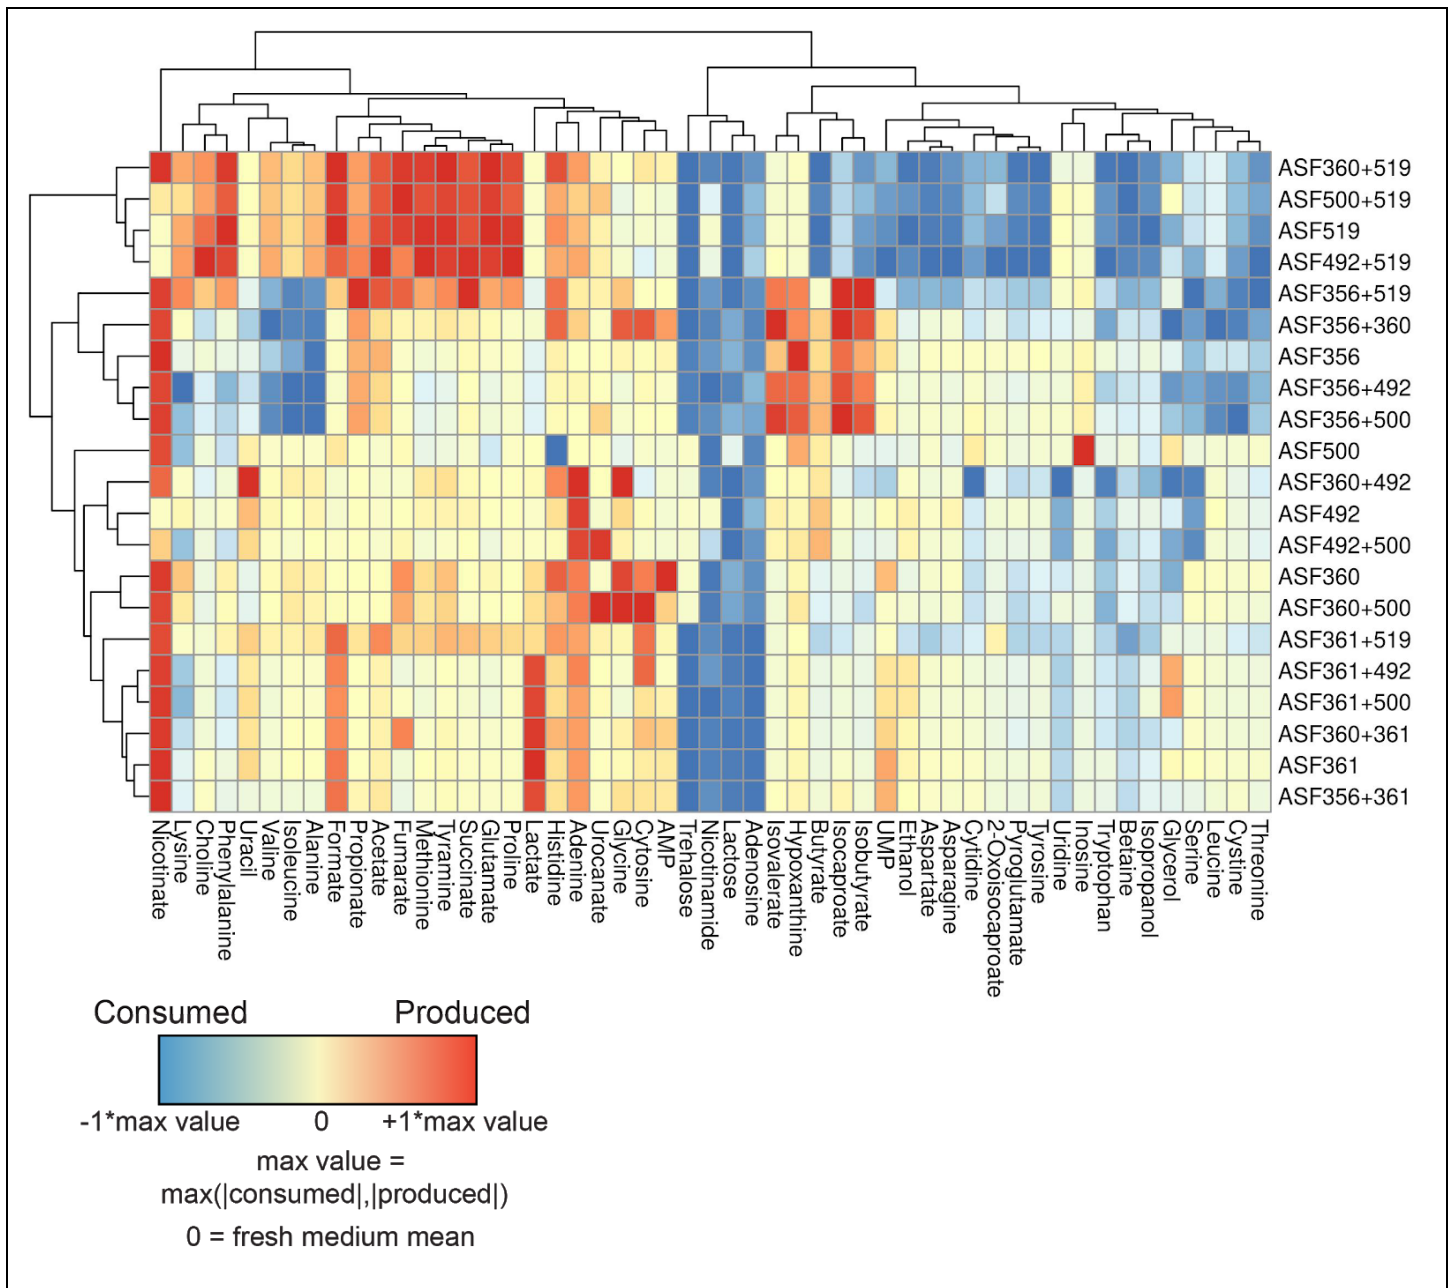

**Figure S1.** Heatmap describing supernatant metabolomes for all mono- and co-cultures after growth (related to Figure 3). Red indicates higher concentration than fresh medium, while blue indicates lower concentration. Values are centered at 0 using the mean value in fresh media, then scaled between -1 and +1 by dividing by the maximum change in concentration for each metabolite in any sample in the study. Only metabolites for which an identity could be determined are shown. Hierarchical clustering of metabolites was performed using Euclidean distances and complete linkage.

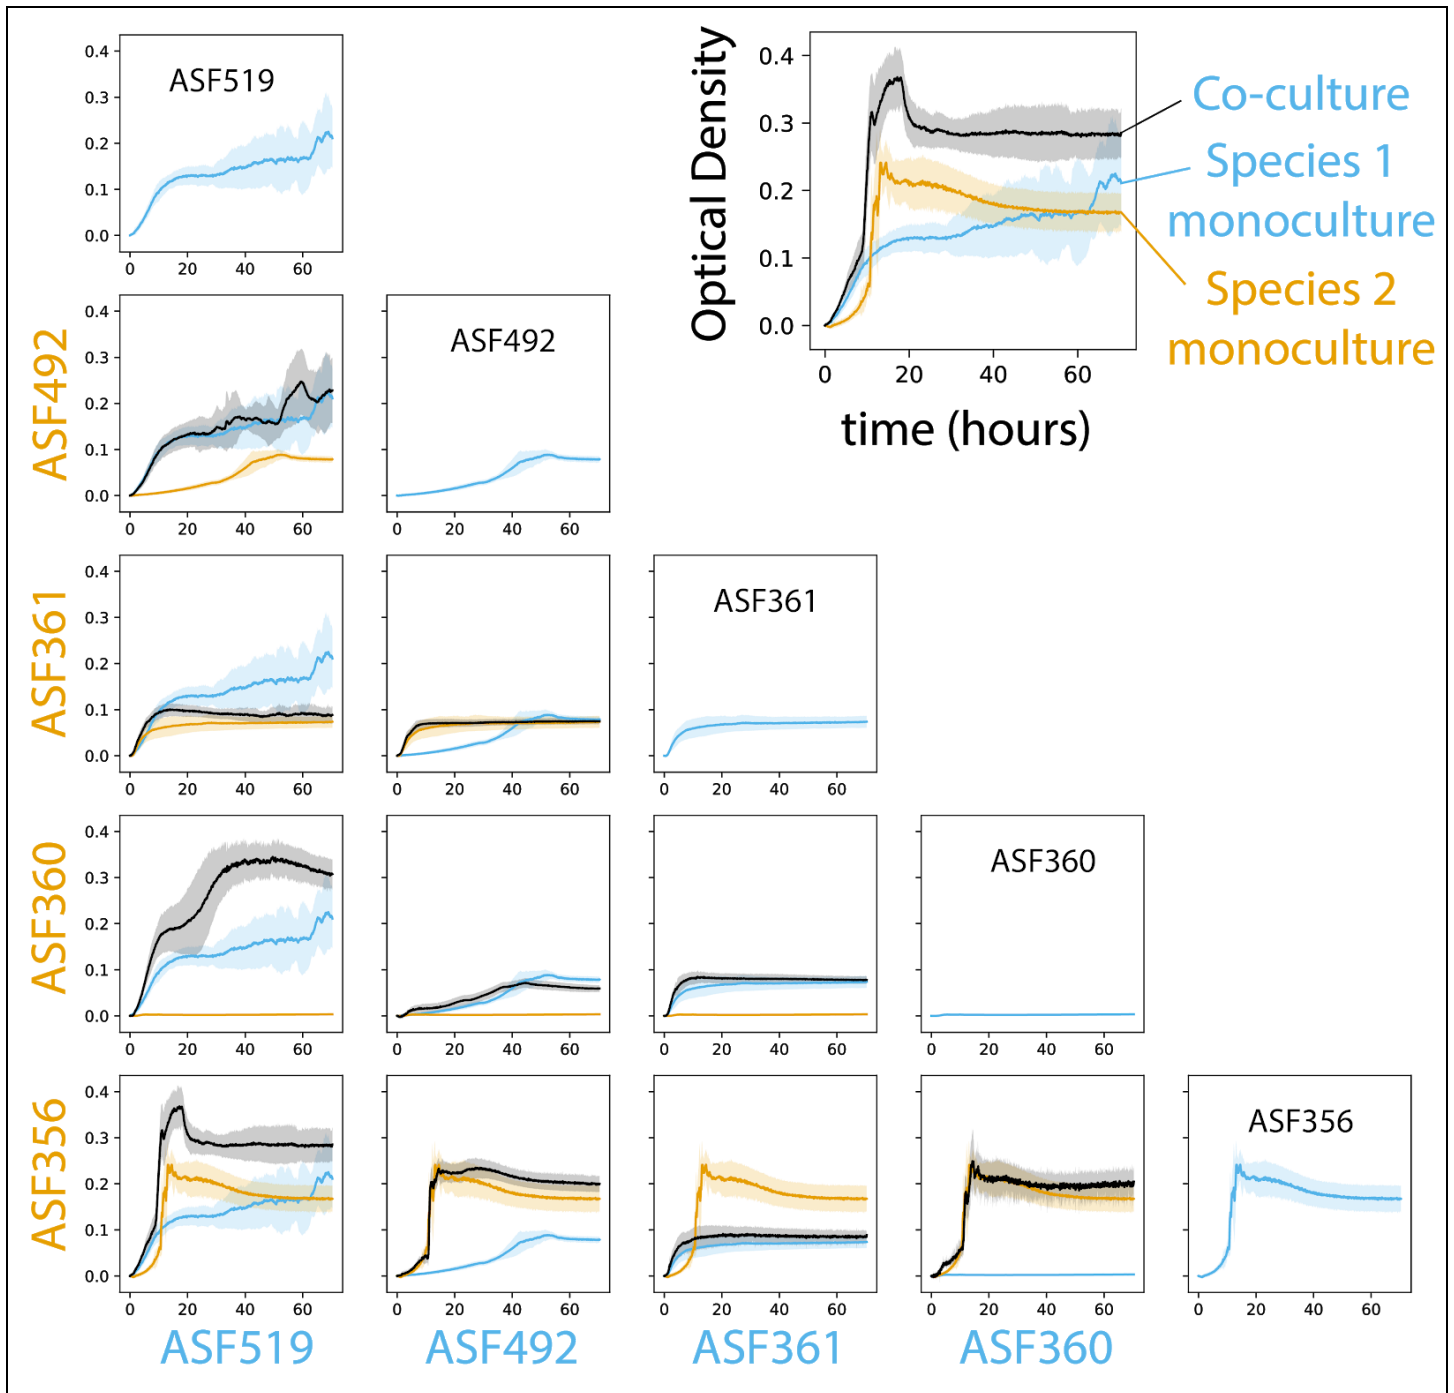

**Figure S2.** Optical density-based growth curves for *Clostridium* ASF356, *Lactobacillus* ASF360, *Lactobacillus* ASF361, *Eubacterium* ASF492, and *Parabacteroides* ASF519 (related to Figures 1 and 2). Optical density was measured at 589nm. Experiments were performed in 96 well plates with 200uL total volume in each well. Each sample group (monocultures and co-cultures) contains 8 biological replicates from a single experiment (e.g. each replicate was grown in an independent well, but they were derived from the same starter culture). Line shows the mean for each sample group, and shading extends one standard deviation from the mean in both the positive and negative direction. Sky blue line indicates monoculture for the strain labelled in sky blue along the x axis. Orange line indicates monoculture for the strain labelled in orange along the y axis. Black line indicates co-culture of the two strains. Diagonal shows the monoculture growth curve for each species. Axes units are identical on all subplots. Time is shown in hours, extending to 72 hours.

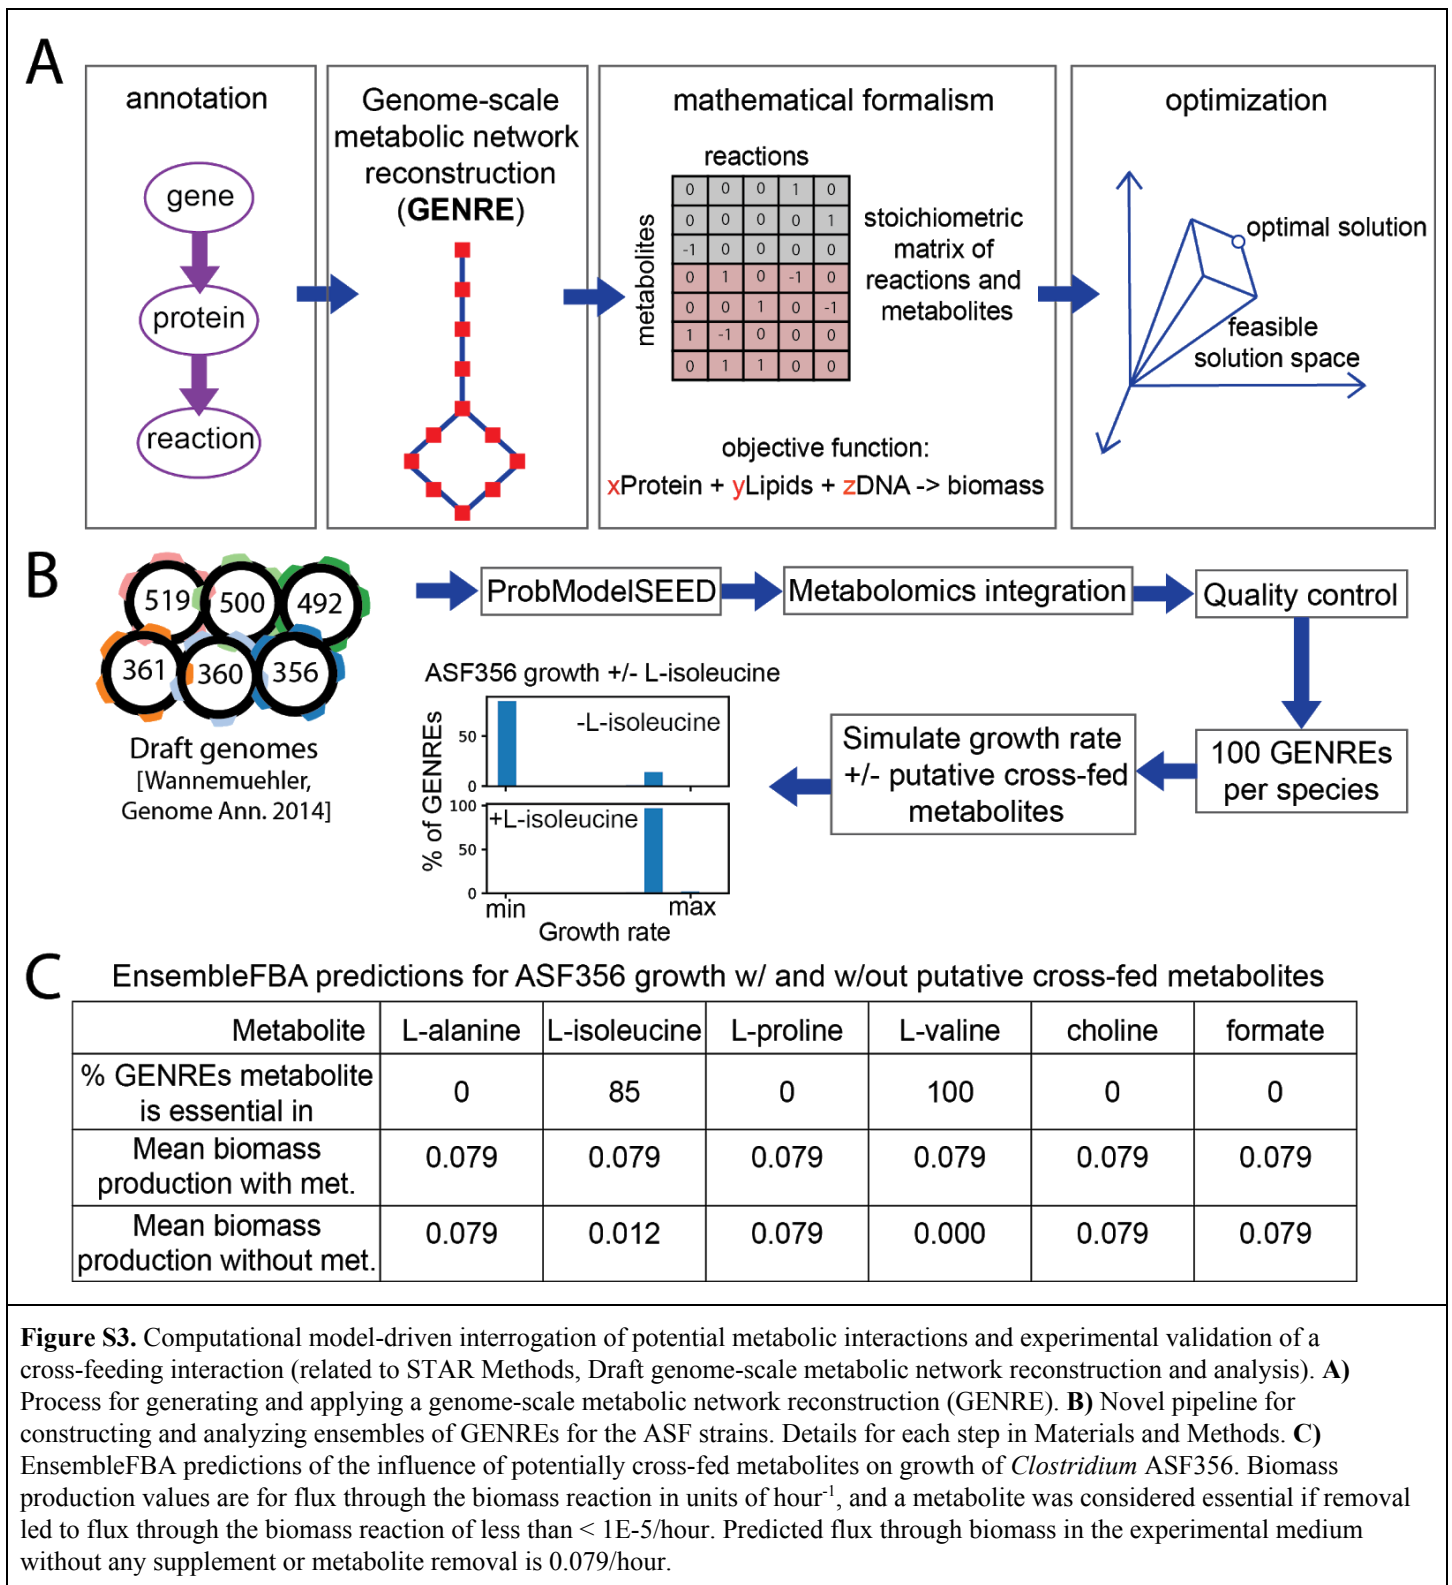

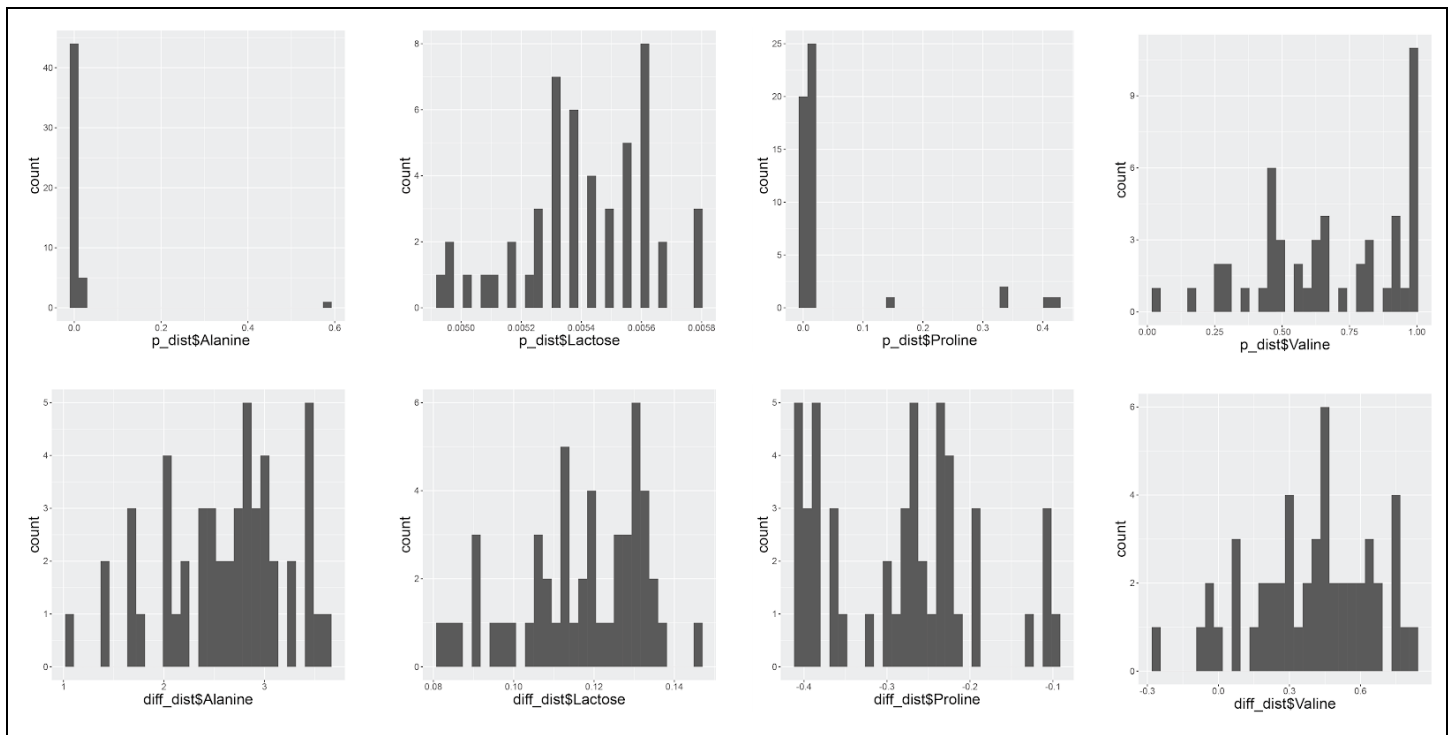

**Figure S4.** Selected examples of ConYE results using bootstrapped strain abundances (related to STAR Methods, Constant Yield Expectation (ConYE) model). Top row shows the distribution of ConYE  $p$ -values for each metabolite and bottom row shows the distribution of difference from the expected value for the same metabolite within each column. Examples are from the co-culture of *Clostridium* ASF356 and *Parabacteroides* ASF519. Distributions were generated by recalculating the average abundance of each strain in monoculture using leave-two-out bootstrapped samples prior to calculating the monoculture yield for each metabolite. N=50 samples with replacement for each monoculture.

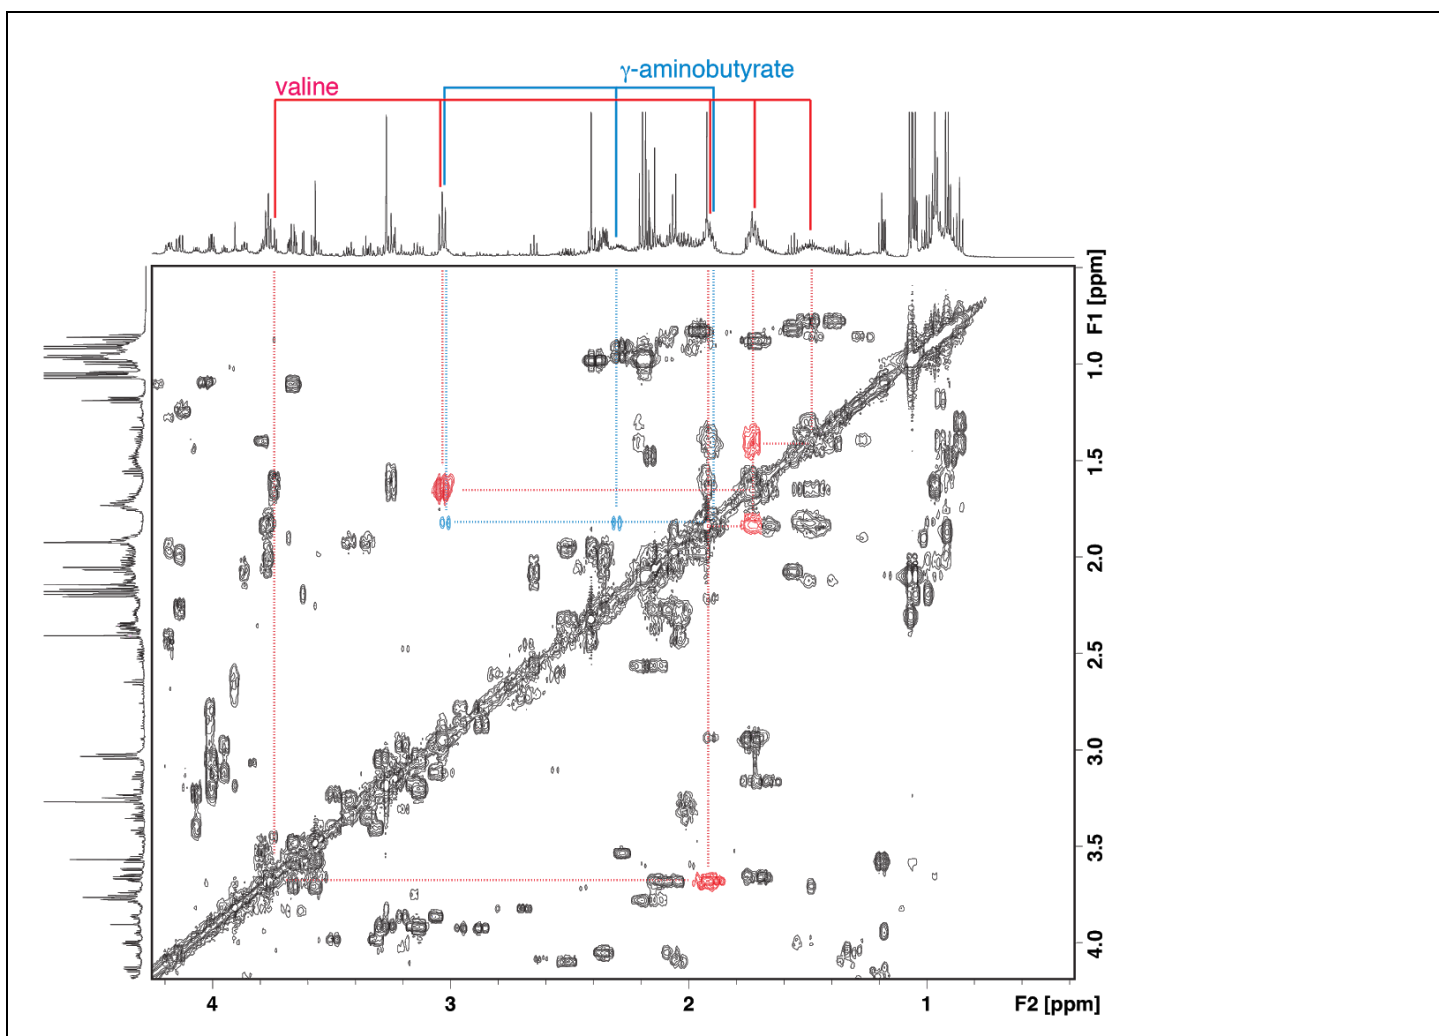

**Figure S5.** 2D <sup>1</sup>H NMR spectra collected on a single sample of supernatant from co-culture of *Clostridium* ASF356 and *Parabacteroides* ASF519 (related to STAR Methods, <sup>1</sup>H nuclear magnetic resonance spectroscopy-based metabolomics). 2D spectra show gamma-aminobutyrate, not 5-aminovalerate, in the region overlapping with valine in 1D. Peaks corresponding to valine shown in red, gamma-aminobutyrate shown in blue.

**Table S1.** Sequences for primers, probes, amplified products, and fluorophore and quencher pairs for each probe. Related to STAR

Methods, Hydrolysis probe-based qPCR assay design.

| strain | Fluor/quencher | gene                  | forward                               | reverse (reverse complement) | full_product                                                                                                                                                                                                                               | probe                                  |
|--------|----------------|-----------------------|---------------------------------------|------------------------------|--------------------------------------------------------------------------------------------------------------------------------------------------------------------------------------------------------------------------------------------|----------------------------------------|
| ASF356 | Cy5/BHQ2       | WP_04034147.1 ASF356  | TGGTGCTGCAACAGAAA<br>AACAGAAA<br>CAG  | GGTATTGTTGCTGGTGGTGG         | TGGTGCTGCAACAGAAAACAG<br>AAATGAAAGAGAAGAAATT<br>AAGAATGGAAGATGCTTTAG<br>CAGCTACAAGAGCAGCAGTA<br>GAAGAAGGTATTGTTGCTGG<br>TGGTGG                                                                                                             | TGCTTTAGCAGCTAC<br>AAGAGCAGCAGTAG<br>A |
| ASF361 | FAM/BHQ1       | WP_04049972.1 ASF361  | GTCGGATCTTAGGCCAC<br>TAGGCCAC<br>GAG  | CAGTTGATGGGGGCATGAGT         | GTCGGATCTTAGGCCACGAG<br>GGGATCGGGATCGTCACTGA<br>AGTTGCTAATGATGTAACCTT<br>CGCTCAAAGTCGGTGATCGC<br>GTAAGTATTGCTTGGTTCTTC<br>AAGGGGTGTGGATACTGTGA<br>ATACTGTACCACAGGTCGTG<br>AAACTCTTTGTCGTAATGTA<br>CAAAATGCAGGTTACTCAGT<br>TGATGGGGGCATGAGT | ATCGGGATCGTCACT<br>GAAGTTGCTAATGAT     |
| ASF492 | FAM/BHQ1       | WP_04053549.1 ASF492  | CAGTGGAAAGTCTGCA<br>GCTCTGCA<br>GGAA  | GGGGATGAAGAGTCCGCAA          | CAGTGGAAAGCTCTGCAGGAA<br>ATGAGCCAGAAAGTAGACG<br>GAAAAAATCACATTGCAAAA<br>GTTGCGGCTATTTCCGCAGG<br>GGATGAAGAAGTCGCAA                                                                                                                          | TCACATTGCAAAAAGT<br>TGCGGCTATTTCCGC    |
| ASF500 | HEX/BHQ1       | WP_023345698.1 ASF500 | GGAAGTATCTCCGGGG<br>CTCCGGGG<br>GACT  | TTGCGTGCTGTGTCAATGG          | GGAAGTATCTCCGGGGGACT<br>GGGCGGCGTATCTGCCGCTG<br>GAGCGGGAAATCCCTAAAA<br>ATGTCCGCAGAGCTATCGCT<br>ATGGAGTGGTCACAGCTTCG<br>AGAGGAAAATTCACCCTTGC<br>GTGCTGTTGTCAATGG                                                                            | TGCCGCTGGAGCGG<br>GAAATCCCT            |
| ASF502 | TR/BHQ2        | WP_04070354.1 ASF502  | GCGAAGTCGTCGAAGG<br>CGTCAAGG<br>TACA  | CCGACAGAGTGGCTCAGATC         | GCGAAGTCCGTCAAGGTACA<br>GAAGGAAAATACCGTAATCG<br>TAGACGGCTCCGGCGACAAG<br>CAGGCGATTGCCGACAGAGT<br>GGCTCAGATC                                                                                                                                 | AATCGTAGACGGCTC<br>CGGCGACAAGCA        |
| ASF519 | HEX/BHQ1       | WP_010802098.1 ASF519 | CGCAGCTTCTATCGCTGG<br>TATCGCTGG<br>TA | CTCCGATGAACCCGGGTATG         | CGCAGCTTCTATCGCTGGTA<br>TGTTCTGACAACAGAATGT<br>GTAATCGCAGAGAAGAAAG<br>AAGATACTCCTGCTATGCCT<br>CCGATGAACCCGGGTATG                                                                                                                           | TGTTCTGACAACAG<br>AATGTGTAATCGCAG      |
| ASF360 | TR/BHQ2        | WP_04039698.1 ASF360  | AGCCGCTTTTGGATTG<br>TTGGATTG<br>GG    | TGGTGGATCGGCGTAATTCC         | AGCCGCTTTTGGATTGTTGG<br>CTACAATTGCGCAAATTGGT<br>CATAAGTCCGTCGTTTGCA<br>TGATGCCAACTTTATCGGTT<br>GGTGGTGGTGGATCGGCGTA<br>ATTCC                                                                                                               | AGTCCGTCGTTTGCA<br>TGATGCCAACTTTAT     |

**Table S3.** Metabolites for which niche expansion was observed (related to Figure 6).

| strains | metabolite       |
|---------|------------------|
| 356,492 | 2-Oxoisocaproate |
| 356,500 | 2-Oxoisocaproate |
| 492,500 | 2-Oxoisocaproate |
| 356,492 | unknown26        |
| 356,500 | unknown26        |
| 492,500 | unknown26        |
| 360,361 | Serine           |
| 361,500 | unknown5         |
| 492,500 | unknown5         |
| 356,492 | Pyroglutamate    |
| 356,500 | Pyroglutamate    |
| 492,500 | Pyroglutamate    |
| 356,361 | unknown25        |
| 356,361 | Tryptophan       |
| 356,500 | Tryptophan       |
| 361,500 | Tryptophan       |
| 492,500 | unknown16        |
| 360,492 | unknown8         |
| 360,500 | unknown8         |
| 492,500 | unknown8         |
| 360,361 | Leucine          |
| 360,492 | Leucine          |
| 361,492 | Leucine          |
| 361,500 | Leucine          |
| 492,500 | Leucine          |
| 361,500 | Cystine          |
| 492,519 | Nicotinamide     |
| 492,500 | unknown2         |
| 500,519 | Glycine          |
| 356,492 | Phenylalanine    |
| 356,500 | Phenylalanine    |
| 360,361 | Phenylalanine    |
| 361,492 | Phenylalanine    |
| 361,500 | Phenylalanine    |
| 492,500 | Phenylalanine    |
| 360,492 | unknown12        |
| 360,500 | unknown12        |
| 492,500 | unknown12        |
| 492,500 | unknown9         |
| 356,492 | Aspartate        |
| 356,500 | Aspartate        |
| 361,492 | Aspartate        |
| 361,500 | Aspartate        |
| 492,500 | Aspartate        |
| 492,500 | unknown7         |
| 356,500 | Tyrosine         |
| 360,361 | Threonine        |

|         |             |
|---------|-------------|
| 360,500 | Threonine   |
| 361,500 | Threonine   |
| 361,500 | unknown33   |
| 361,492 | unknown3    |
| 361,500 | unknown3    |
| 492,519 | unknown4    |
| 361,500 | Choline     |
| 360,492 | unknown10   |
| 360,361 | Succinate   |
| 361,492 | Succinate   |
| 361,500 | Succinate   |
| 492,500 | Proline     |
| 492,500 | Trehalose   |
| 492,500 | unknown13   |
| 361,500 | unknown1    |
| 492,500 | Isoleucine  |
| 356,492 | Methionine  |
| 356,500 | Methionine  |
| 361,492 | Propionate  |
| 361,500 | Propionate  |
| 492,500 | Propionate  |
| 361,500 | Alanine     |
| 360,361 | Valine      |
| 361,492 | Valine      |
| 361,500 | Valine      |
| 361,492 | unknown18   |
| 356,492 | Glutamate   |
| 361,492 | Glutamate   |
| 492,500 | UMP         |
| 356,492 | Lysine      |
| 356,500 | Lysine      |
| 360,361 | Lysine      |
| 361,492 | Lysine      |
| 361,500 | Lysine      |
| 492,500 | Lysine      |
| 492,500 | Isocaproate |
| 356,500 | Asparagine  |
| 360,492 | Asparagine  |
| 361,500 | Asparagine  |
| 356,492 | Isopropanol |
| 356,500 | Adenine     |
| 492,519 | Cytosine    |
| 360,519 | unknown32   |
